# Supplementary material for: Consensus on managing delayed methotrexate elimination in high-dose therapy: insights from the Middle East
Source: Front Oncol. 2025 Nov 6;15:1660937. doi: 10.3389/fonc.2025.1660937 (PMC12631234; doi:10.3389/fonc.2025.1660937)
Supplement: Supplementary file 1 [file Table1.xlsx]

## Sheet: Author details
	Supplementary Table 1 Details of the Panelists.
Order	Name	Highest academic degrees	Designation/Title	Email	Department	Institution	City	Country
1	Mubarak Al Manasour	PhD, MD	Professor	drmubarak55@gmail.com	1Adult Medical Oncology 2College of Medicine	Princess Noorah Oncology Centre, Ministry of National Guard Health Affairs-Western Region (MNGHA-WR), King Saud Bin Abdul Aziz University for Health Sciences (KSAU-HS), King Abdullah International Medical Research Centre (KAIMRC) King Abdullah International Medical Research Centre (KAIMRC), King Saud Bin Abdul Aziz University for Health Sciences (KSAU-HS), Ministry of National Guard Health Affair…	Jeddah	KSA
2	Ahmed Absi	MD, ECFMG	BMT-Section Head.Assistant professor of Medicine-Joint Appointment	aaabsi@hotmail.com	Oncology	Princess NorahOncology Center.King Abdulaziz Medical City. Ministry of National Guard Health Affairs. King Saud bin Abdulaziz University for Health Sciences.	Jeddah	KSA
3	Ahmed Alhuraiji	Bachelor of Medicine & Surgery-Honors II	Consultant Internal medicone, Hematology	aalhuraiji@gmail.com	Department of Hematology	Kuwait Cancer Control Center, Ministry of health. Department of Translational Research, Dasman Diabetes Institute, Dasman, Kuwait	Kuwait	Kuwait
4	Muhammad Faisal Khanani	MBBS, FCPS, DCH, MRCPI, MRCPCH(UK)	Chief of Pediatric hematology, Oncolgy	smilesaif@hotmail.com	1. Pediatric hematology oncology, tawam	Tawam Hospital	Al Ain	UAE
5	Kayane Mheidly	MD, MSc	Consultant Hematologist/Oncologist	Mheidlykayane@yahoo.fr	Hematology Department	Sheikh Shakhbout Medical City	Abu Dhabi	UAE
6	Mohamed Elsaid	MD, FAAP	Section Head, Pediatric hematology/ oncology	MYElsaid@gmail.com / Melsaid@Kfshrc.edu.sa	Department of Pediatrics	KFSH Madinah	Madinah	KSA
7	Walid Ballourah	MD, ECFMG, MCCEE,SITE	Department of Pediatric hematology/ oncology &stem cell transplant	mballourah@kfshrc.edu.sa / wld999@hotmail.com	Department of Pediatric hematology	King Faisal Specialized Hospital and Research Center . King Fahad Medical City .	Riyadh	Saudi Arabia
8	Murtadha Al-Khabori	MD, FRCP, MSc	Associate professor	mkkhabori@gmail.com	Hematology	Sultan Qabous University	Muscat	Oman
9	Naser Al Zain	MD, FAAP, ABP, ABP (hem/onc)	Head of Services and Consultant Pediatric Hematology/Oncology Mediclinic-Middle East. Clinical Associate Professor of Pediatric Hematology/Oncology at Mohamed Bin Rashid University of Medicine & Health Sciences	naseralzein@yahoo.com	1. Pediatric Hematology/Oncology Mediclinic-Middle East. 2. Pediatric Hematology/Oncology at Mohamed Bin Rashid University of Medicine & Health Sciences	Mediclinic	Dubai	UAE
10	Nisreen Khalifa	MD, PhD	Pediatric hematology/ oncology &stem cell transplant Dept.	nkhalifa@moh.gov.kw / khalifa.nisreen@gmail.com	oncology &stem cell transplant Dept.	NBK Children's Hospital , Ministry of health	Kuwait	Kuwait
11	Rawad Rihani	MD,MSc.	Chairperson, Department of Pediatrics Unit	rrihani@khcc.jo / rawad.jspo@gmail.com	Department of Pediatrics	King Hussein Cancer Center	Amman	Jordan
12	Shaker Abdallah	MD, SCBP	Consultant Pedia Hema / Onco and BMT, Head of Pediatric Hematology Oncology Unit	Shakerabdullah@hotmail.com	Department of Oncology, King Faisal Specialized Hospital Jeddah. Saudi Arabia	King Faisal Specialized Hospital	Jeddah	KSA
13	Yasser Wali	MD, PHD	Head of Pediatric Hematology	yawali@squ.edu.om / yasser_wali@hotmail.com	Child Health Department, College of Medicine and Health Sciences, Sultan Qaboos University	College of Medicine and Health Sciences, Sultan Qaboos University	Muscat	Oman
